# Supplementary material for: EBF1 Negatively Regulates Brassinosteroid-Induced Apical Hook Development and Cell Elongation through Promoting BZR1 Degradation
Source: MDPI journal article supplement (doi:10.3390/ijms232415889), 2022-12-14
Supplement: s1 [file s1]

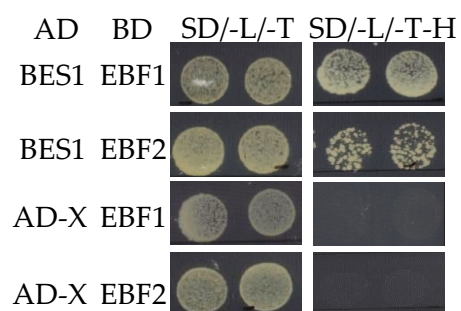

**Figure S1. EBF1/2 interacted with BES1.**

The yeast two hybrid assay showed BES1 interacted with EBF1 and EBF2 in yeast.

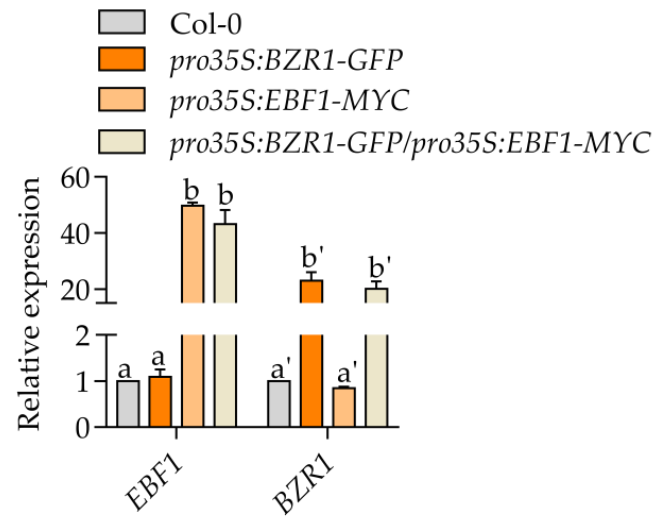

**Figure S2. The expression level of *BZR1* and *EBF1* in the hybrid line.**

Quantitative RT-PCR showed the *EBF1* and *BZR1* expression level in indicated plants. Total RNAs were extracted from 7-day-old seedlings grown on ½ MS medium. *PP2A* gene was analysed as an internal control. Error bars are SD of three biologic replicates. Different letters above bars indicate statistically significant differences between samples (One-way ANOVA followed by post-hoc Tukey test,  $p < 0.05$ ).

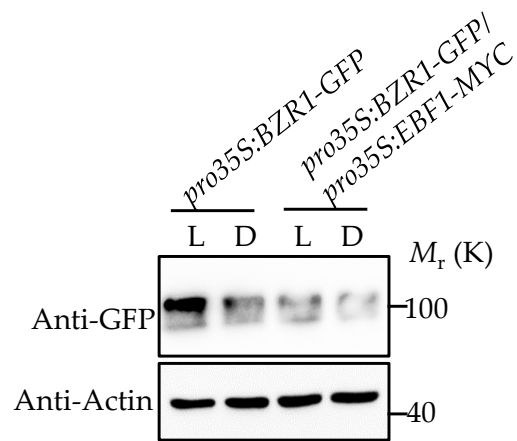

**Figure S3. EBF1 promoted the degradation of BZR1 in darkness.**

The protein level of BZR1 in transgenic Arabidopsis plants expressing *pro35S:BZR1-GFP* only or co-expressing *pro35S:EBF1-MYC* and *pro35S:BZR1-GFP*. Seedlings were grown on ½ MS medium for 7 days in white light then treated with or without darkness for 24h. BZR1 was detected with anti-GFP antibody. Actin was used as a control.

**Table S1.** Oligo primers Used in this Study

## Gene cloning

| Gene | Forward                      | Reverse                      |
|------|------------------------------|------------------------------|
| EBF1 | ATGTCTCAGATCTTTAGTTTTG<br>CC | GGAGAGGATGTCACATTTGTAA<br>AG |

## CHIP-PCR

| Gene      | Forward              | Reverse                     |
|-----------|----------------------|-----------------------------|
| PP2A ChIP | CGGCTTTCATGATTCCCTCT | GCCTTAAGCTCCGTTTCCTACT<br>T |
| EBF1 CHIP | GAACCCCAATTCTCAGCTC  | CGAGGAGATAGAGAGCGAAG        |

## RT-PCR

| Gene      | Forward                       | Reverse                       |
|-----------|-------------------------------|-------------------------------|
| PP2A RT   | TTCTCGCTCCAGTAATGGGATCC<br>GA | GTTCTCCACAACCGCTTGGTGC<br>ACT |
| SAUR15 RT | TTGAGGAGTTTCTTGGGTGCTAA<br>G  | GCCATGAATCCTCTTGGTGTGC        |
| EXP8 RT   | TCCTCCTCTTCAGCATTTTCGACCT     | CTTGCCACGACTGTGTTTTGA<br>GC   |
| EBF1 RT   | AGCAAAGTCCAGATTCTCAGT<br>G    | AGGAGGCCAATGCTTGAATCC<br>C    |
| BZR1 RT   | GCAGATGTCTCAAATACTGCTG<br>CCT | GACATGCCATTTGGGTTGCCT<br>AG   |

## Genotyping

| Gene   | Forward                             | Reverse                         |
|--------|-------------------------------------|---------------------------------|
| ebf1   | AGCAATTGCTGTTGGAAGTCTGG<br>T        | TTCTCATGAACTGTGGCTCAA           |
| LBI    | GGCAATCAGCTGTTGCCCCGTCTCA<br>CTGGTG |                                 |
| pif1   | CTCTTTTGGATCTTTCTGGGG               | GACTTGCGCACGATAGCTAAC           |
| pif3   | AGTCTGTTGCTTCTGCTACGC               | AAGAACCGGCAAAGATACCA<br>C       |
| pif4   | AATTCATCATCGGGGATTAGG               | TCGTCGTTTAATAAACACGGC           |
| pif5   | CGATTTGTTACCCATGGTTTG               | CCTTGCTCGATTTTGTACG             |
| LBb1.3 | ATTTTGCCGATTCGGAAC                  |                                 |
| ein3-1 | GAGCAAGCTAGGAGGAAGAAAA<br>TGTCTAG   | TTTAGGCAAACCAAGTTGATG<br>CCAC   |
| eil1   | GATCGTAATGGTCCAGCT                  | ATAAAGGATCCGAGCCACAA<br>CCTCTTC |
